# Supplementary material
Source: PubMed Central journal article supplement (PMC3903356)

### Ideal observer

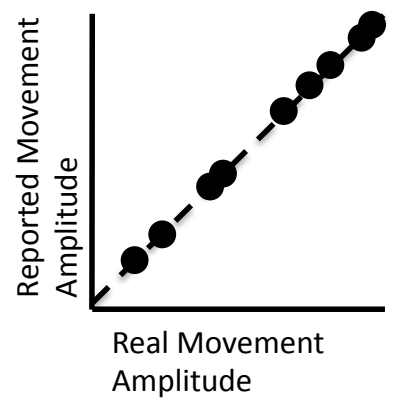

### Possible deviations from the ideal observer

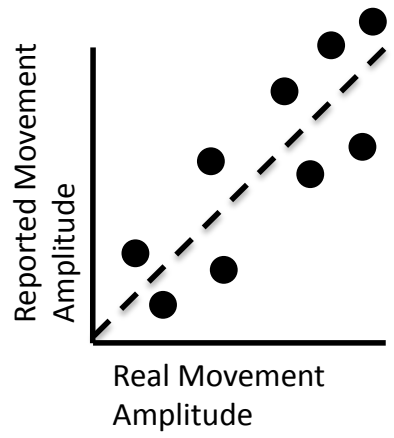

Type I

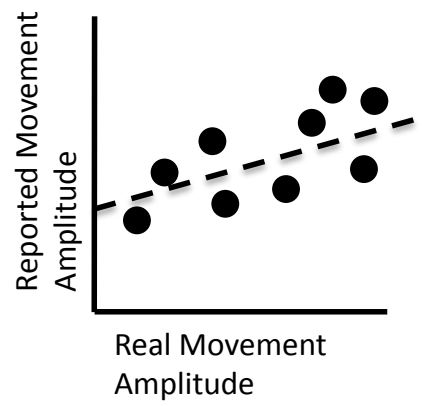

Type II

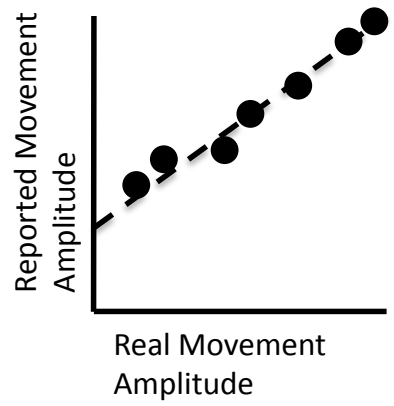

Type III

Supplement: tjp0592-0141-sd1.pdf [file tjp0592-0141-sd1.pdf]

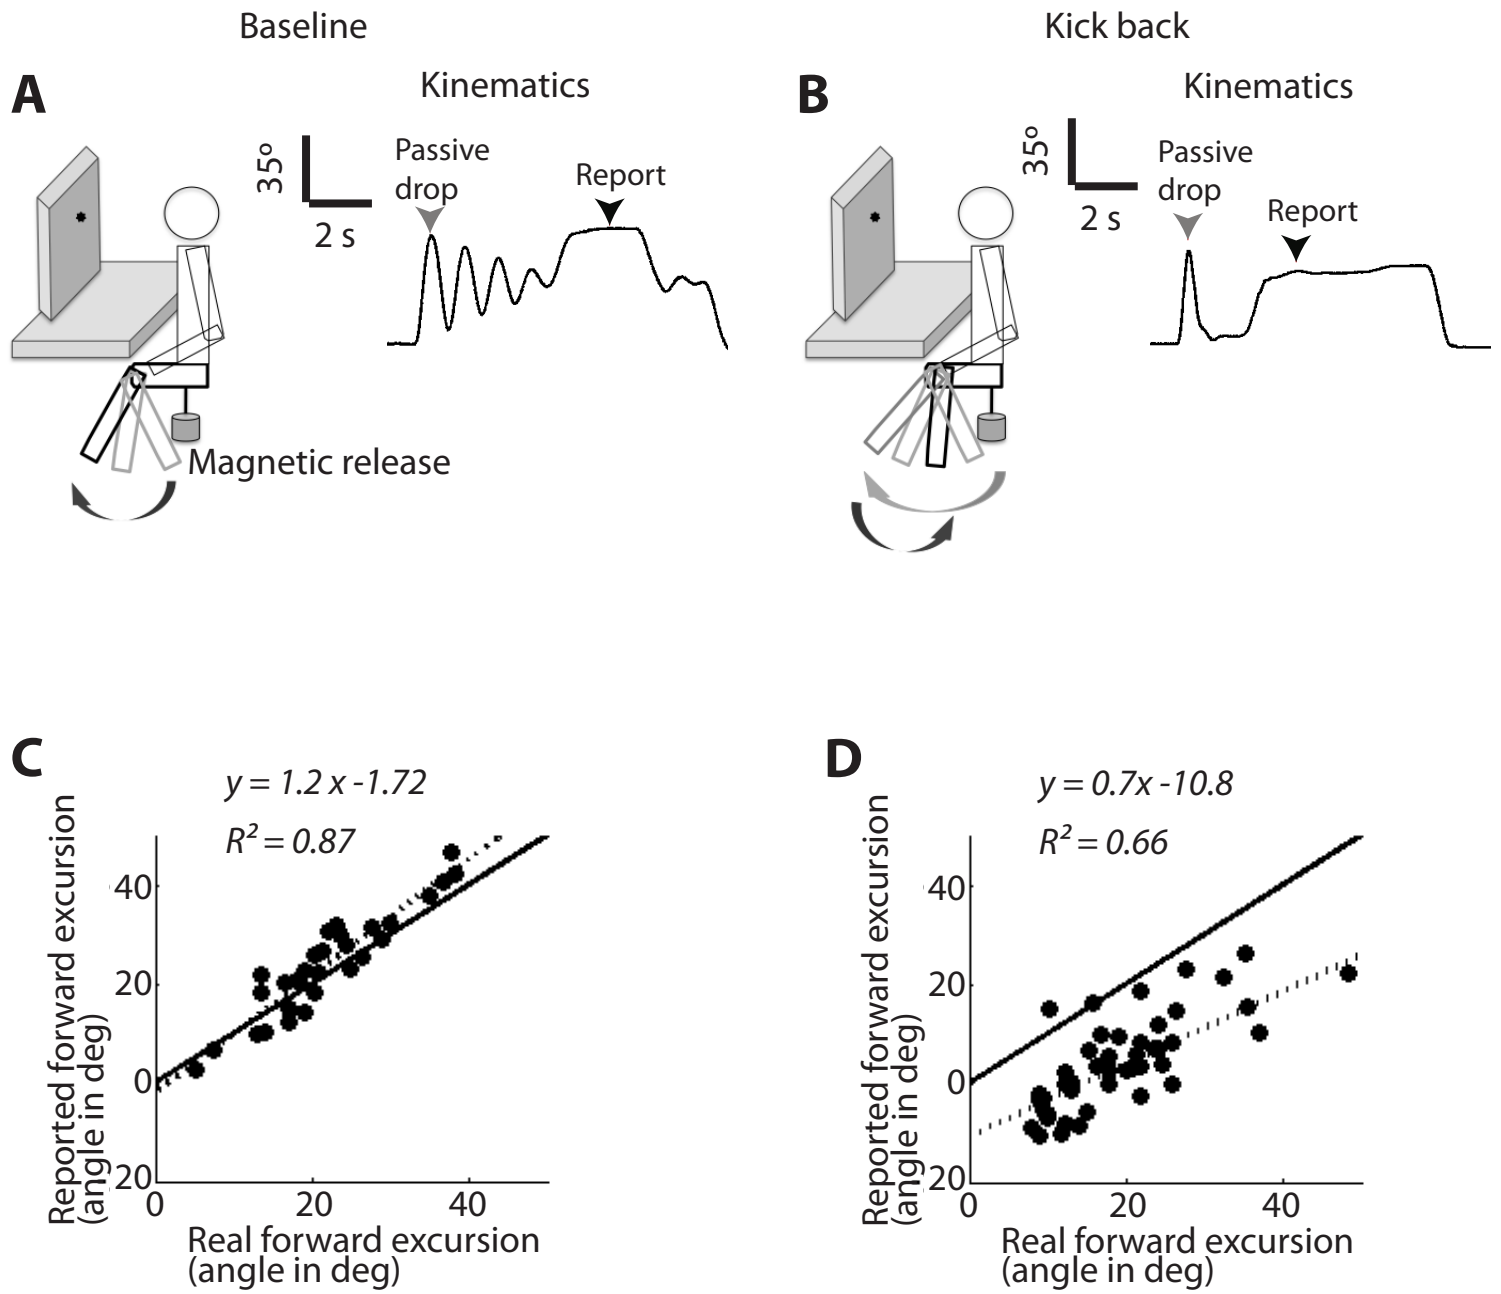

Figure 3

Supplement: tjp0592-0141-sd2.pdf [file tjp0592-0141-sd2.pdf]

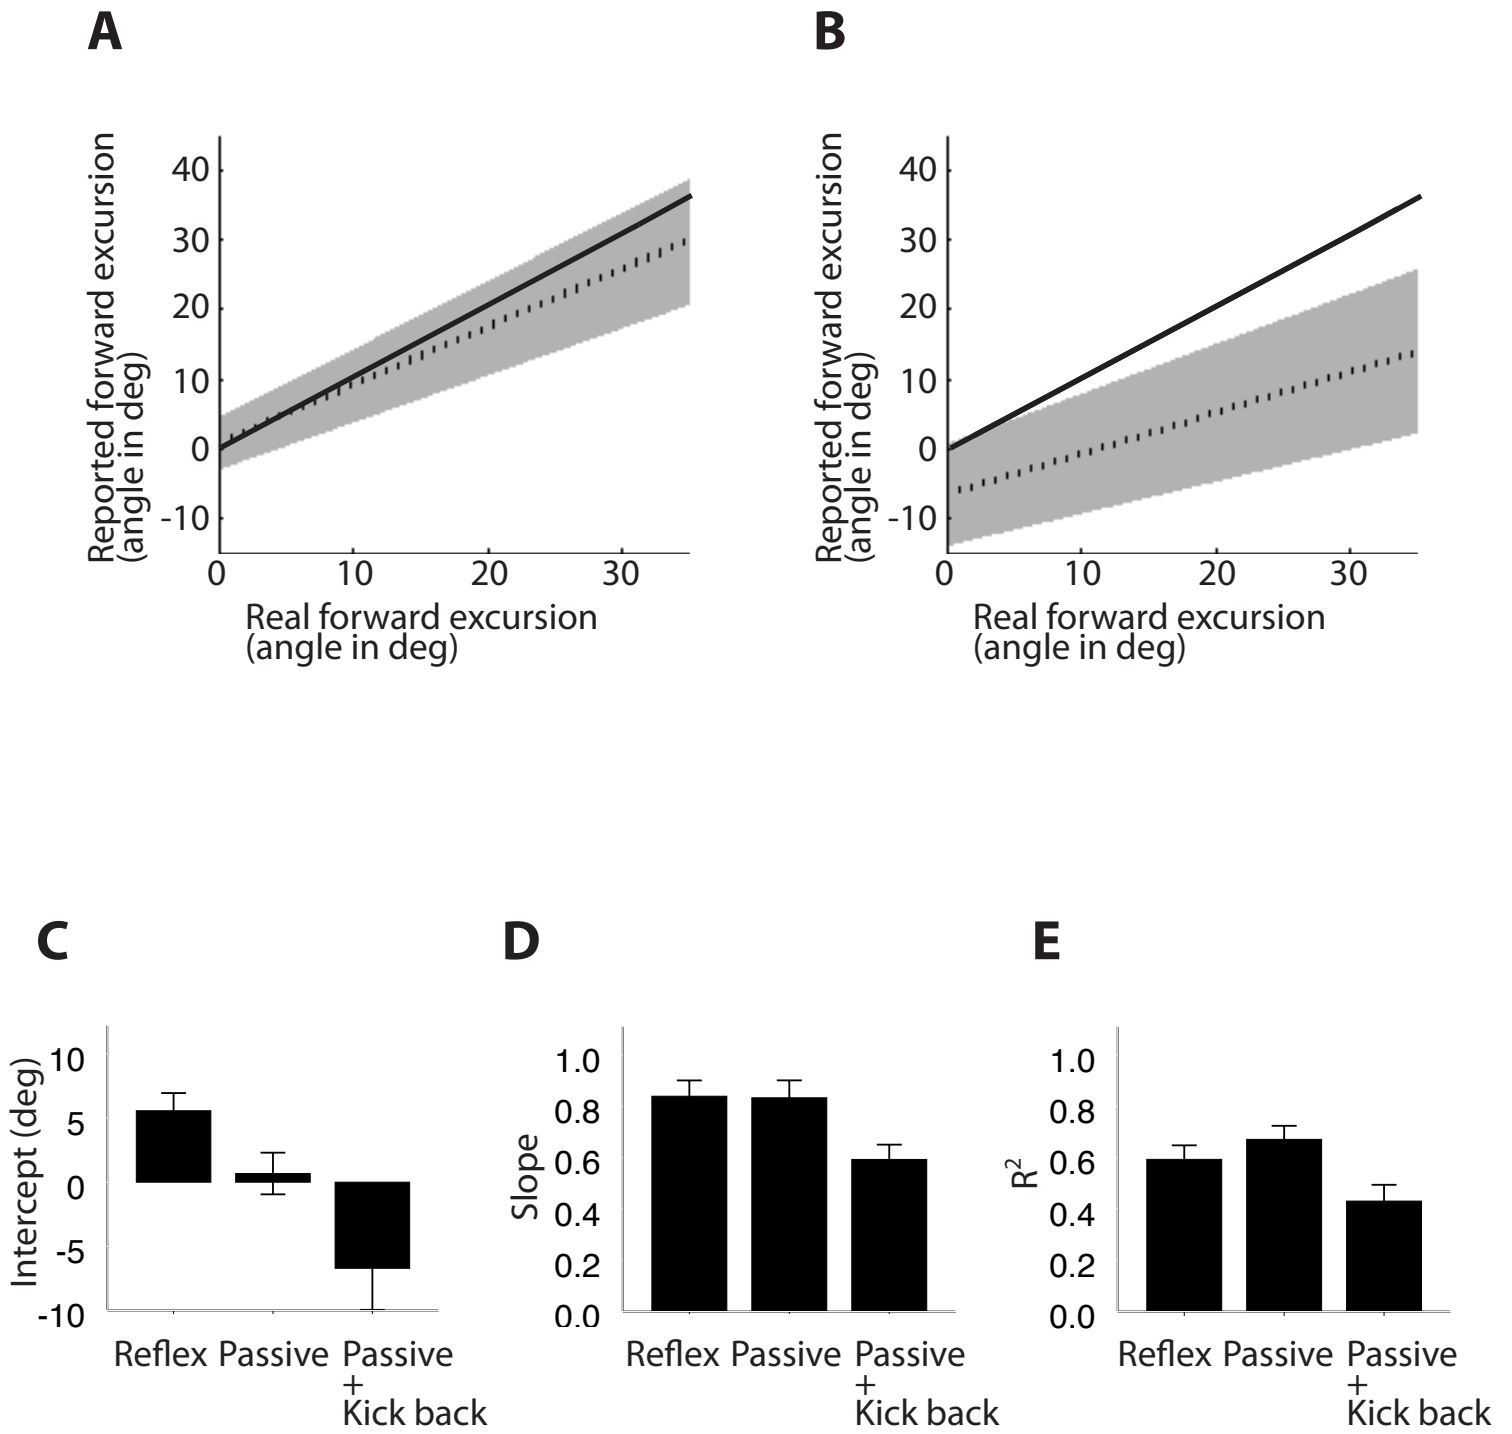

Figure 4

Supplement: tjp0592-0141-sd3.pdf [file tjp0592-0141-sd3.pdf]
